# Supplementary material for: The Effect of Voluntary Exercise on Gut Microbiota in Partially Hydrolyzed Guar Gum Intake Mice under High-Fat Diet Feeding
Source: PubMed Central journal article supplement (PMC7551544; doi:10.3390/nu12092508), 2020-08-19
Supplement: nutrients-12-02508-s001.pdf [file nutrients-12-02508-s001.pdf]

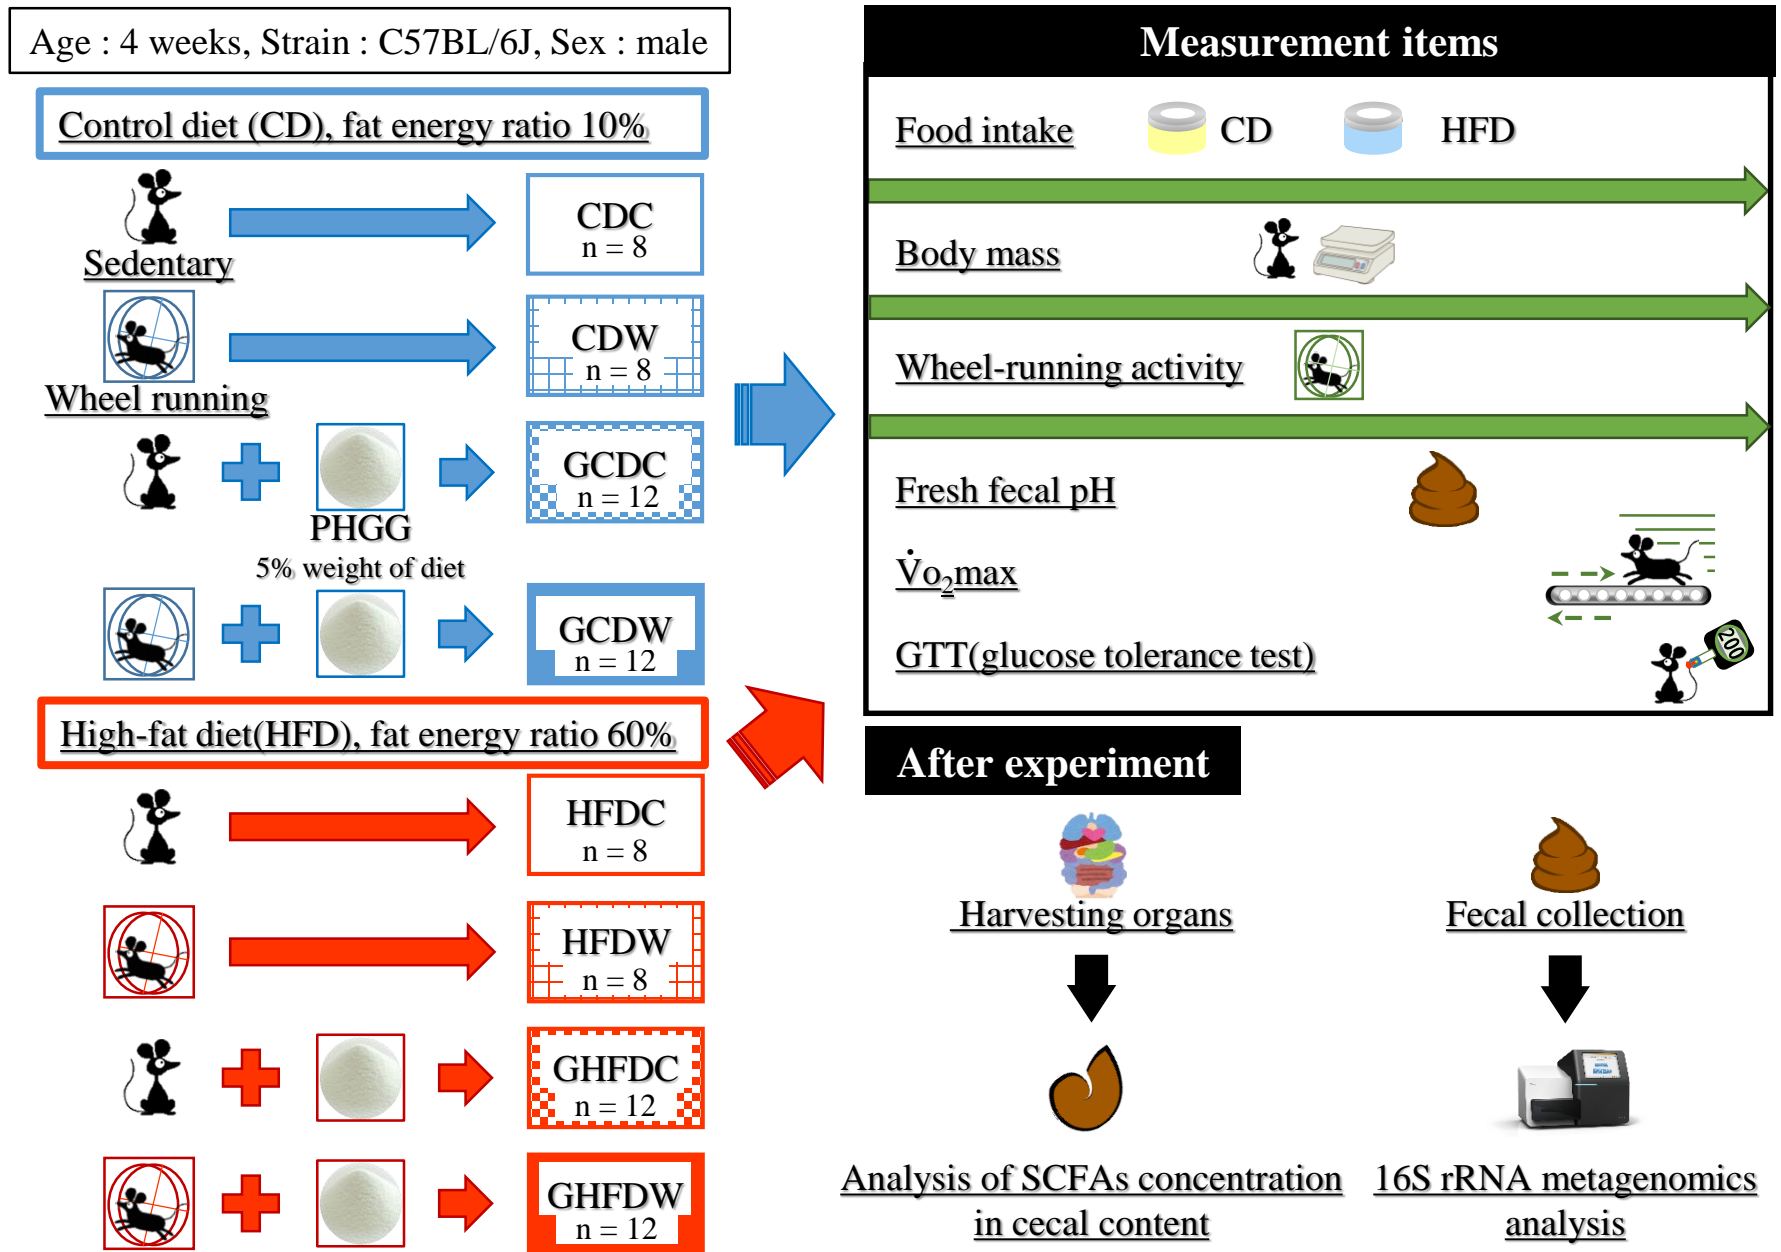

**Figure S1. Schematic illustration of experimental design of this study.**

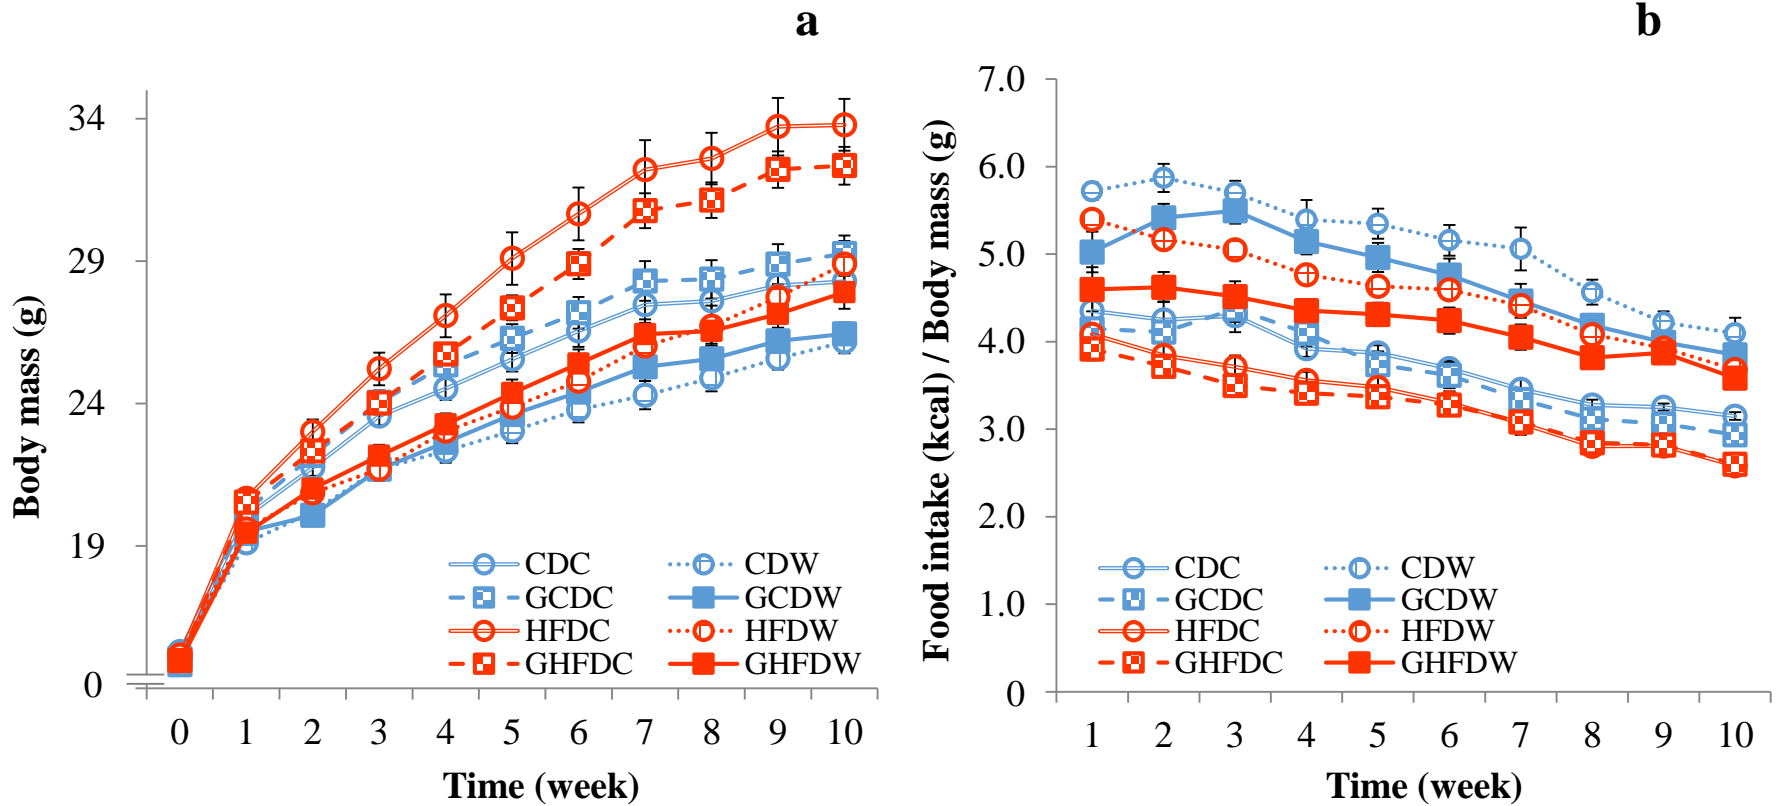

**Figure S2. Effects of PHGG and wheel running on body mass (a) and food intake (b) in CD and HFD fed mice.**

Food intake showed as energy intake (kcal) per body mass at each week. The values were expressed as the mean  $\pm$  S.E.M.
